# Supplementary material for: Annealing Accelerator for Ising Spin Systems based on In-memory Complementary 2D FETs
Source: Research Square preprint supplement (doi:10.21203/rs.3.rs-331394/v2), 2021-07-19
Supplement: Supplementary file 1 [file 68f466ea592f8dcba0b07e1b.pdf]

# **Supplementary Information**

## **Annealing Accelerator for Ising Spin Systems based on In-memory**

### **Complementary 2D FETs**

*Amritanand Sebastian<sup>1</sup>, Sarbashis Das<sup>2</sup> & Saptarshi Das<sup>1,3,4\*</sup>*

*<sup>1</sup>Department of Engineering Science and Mechanics, Penn State University, University Park, PA 16802*

*<sup>2</sup>Department of Electrical Engineering, Penn State University, University Park, PA 16802*

*<sup>3</sup>Department of Materials Science and Engineering, Penn State University, University Park, PA 16802*

*<sup>4</sup>Materials Research Institute, Pennsylvania State University, University Park, PA 16802*

**Supplementary Figure 1**

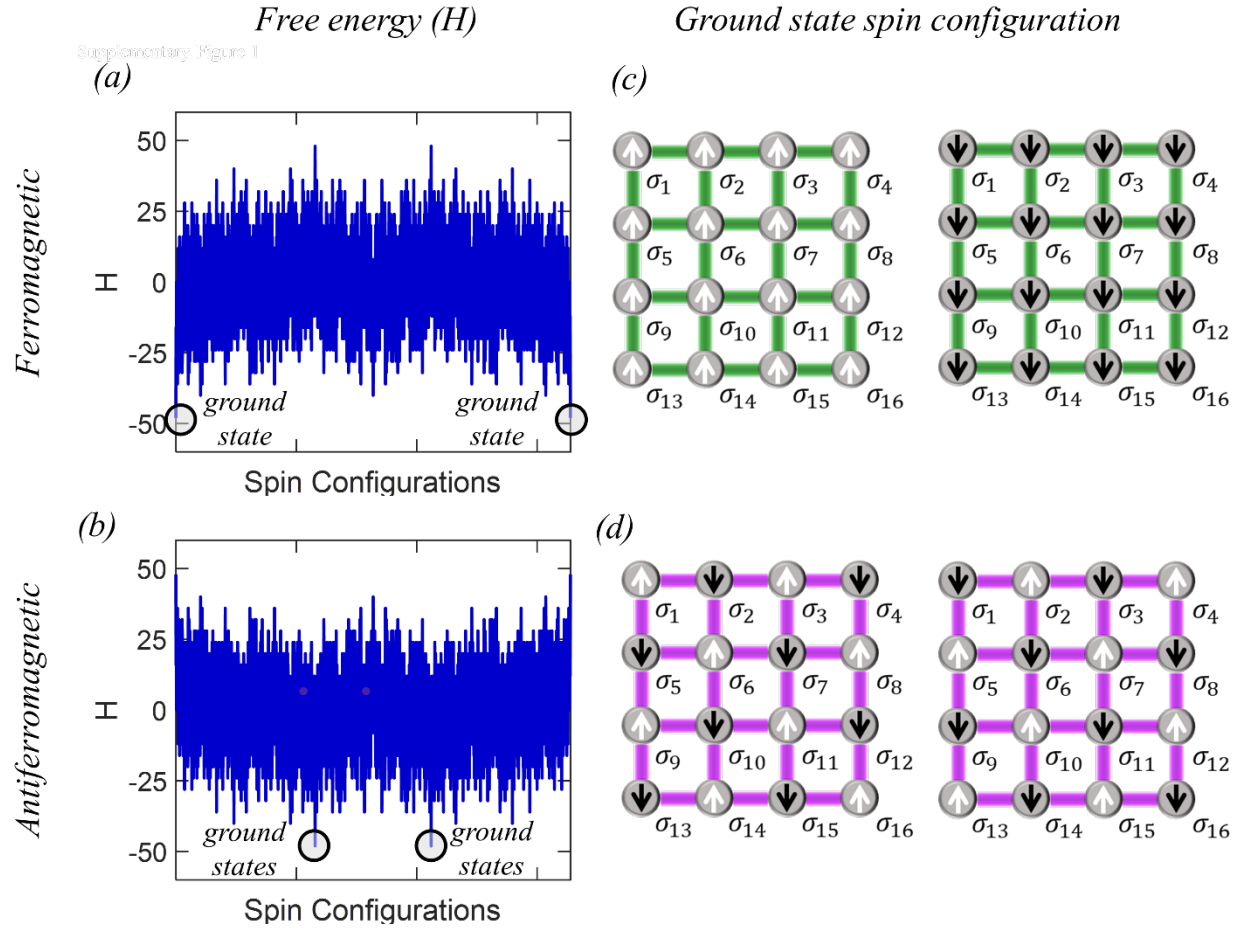

**Supplementary Figure 1. Ferromagnetic and antiferromagnetic spin systems.** Free energy ( $H$ ) for a  $4 \times 4$  a) ferromagnetic and b) antiferromagnetic systems with ground states degeneracy of 2. Corresponding ground-state spin configurations for a) ferromagnetic and b) antiferromagnetic systems.

**Supplementary Figure 2**

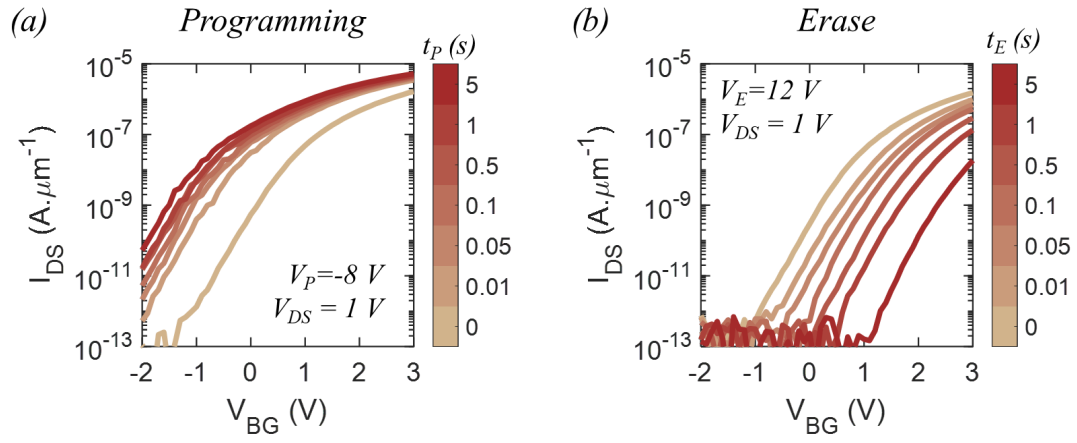

**Supplementary Figure 2. Pulse width dependent programmability of MoS<sub>2</sub> FET.** a) Transfer characteristics of post-programmed MoS<sub>2</sub> FET by applying constant  $V_P$  for varying  $t_P$ . b) Transfer characteristics of post-erased MoS<sub>2</sub> FET by applying constant  $V_E$  for varying  $t_E$

**Supplementary Figure 3**

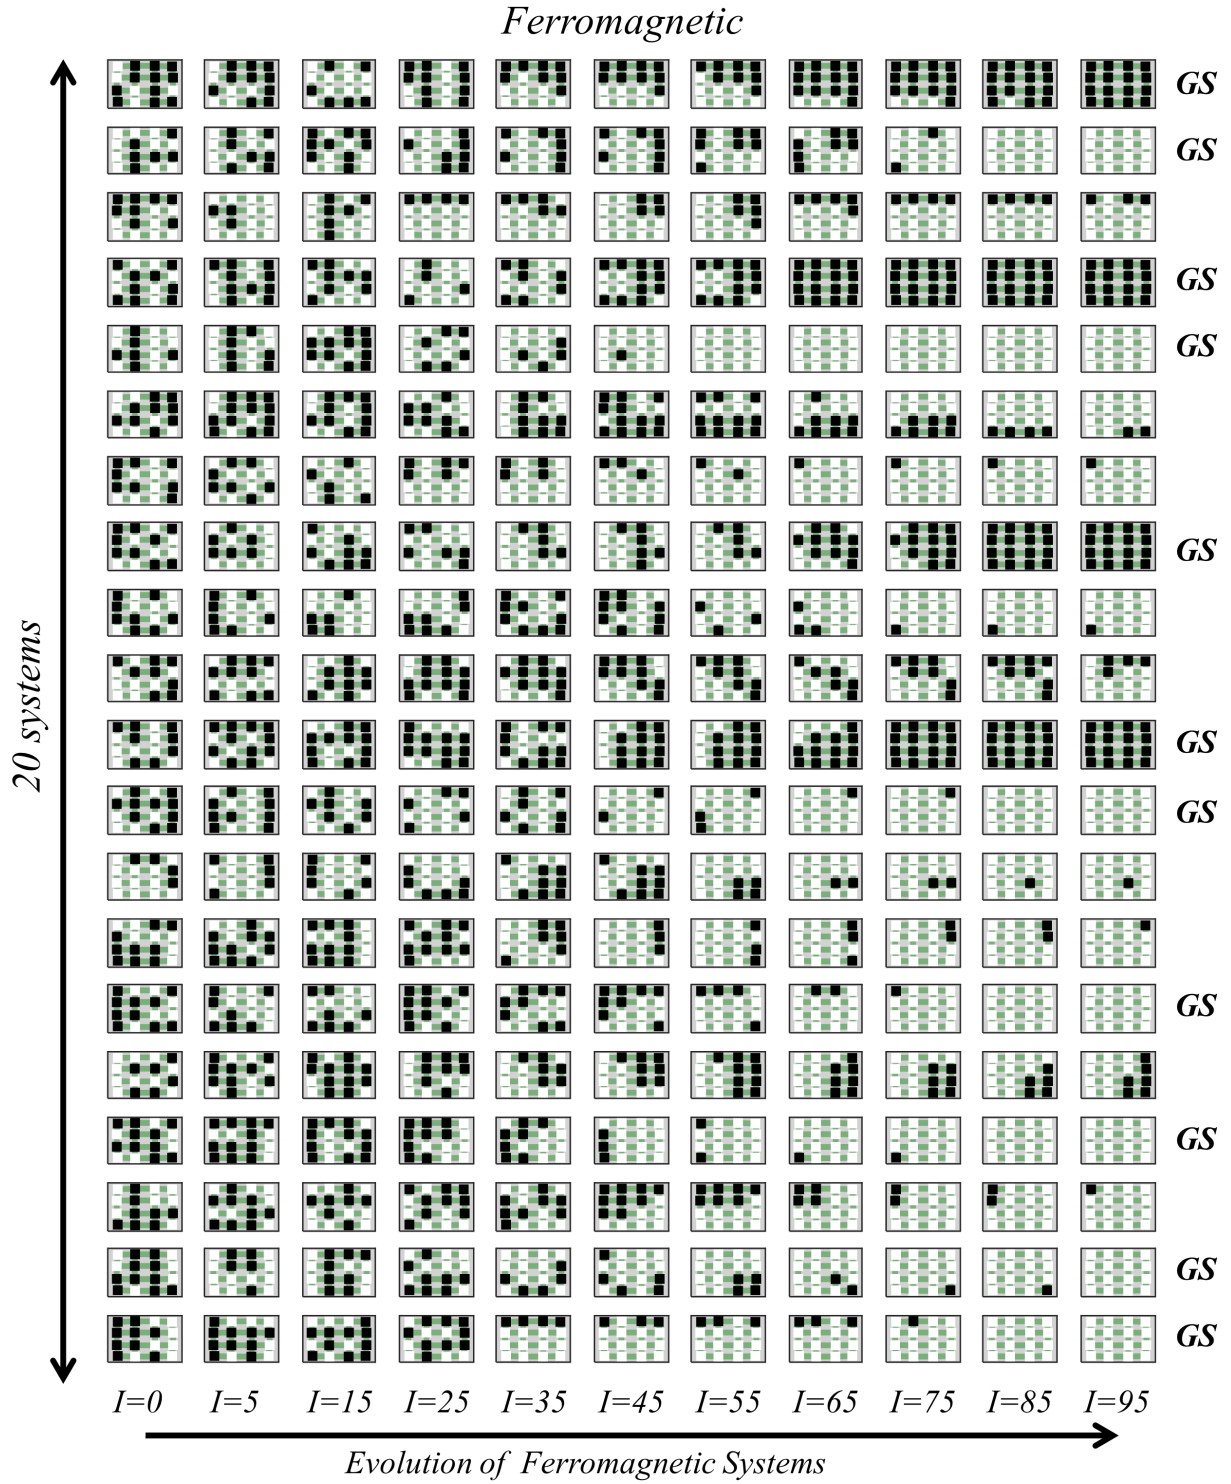

**Supplementary Figure 3. Experimental demonstration of SA on ferromagnetic system.** Progression of 20 randomly initiated  $4 \times 4$  ferromagnetic systems as successive iterations ( $I$ ) are performed using SA in hardware. 11 systems converged and reached their ground states.

**Supplementary Figure 4**

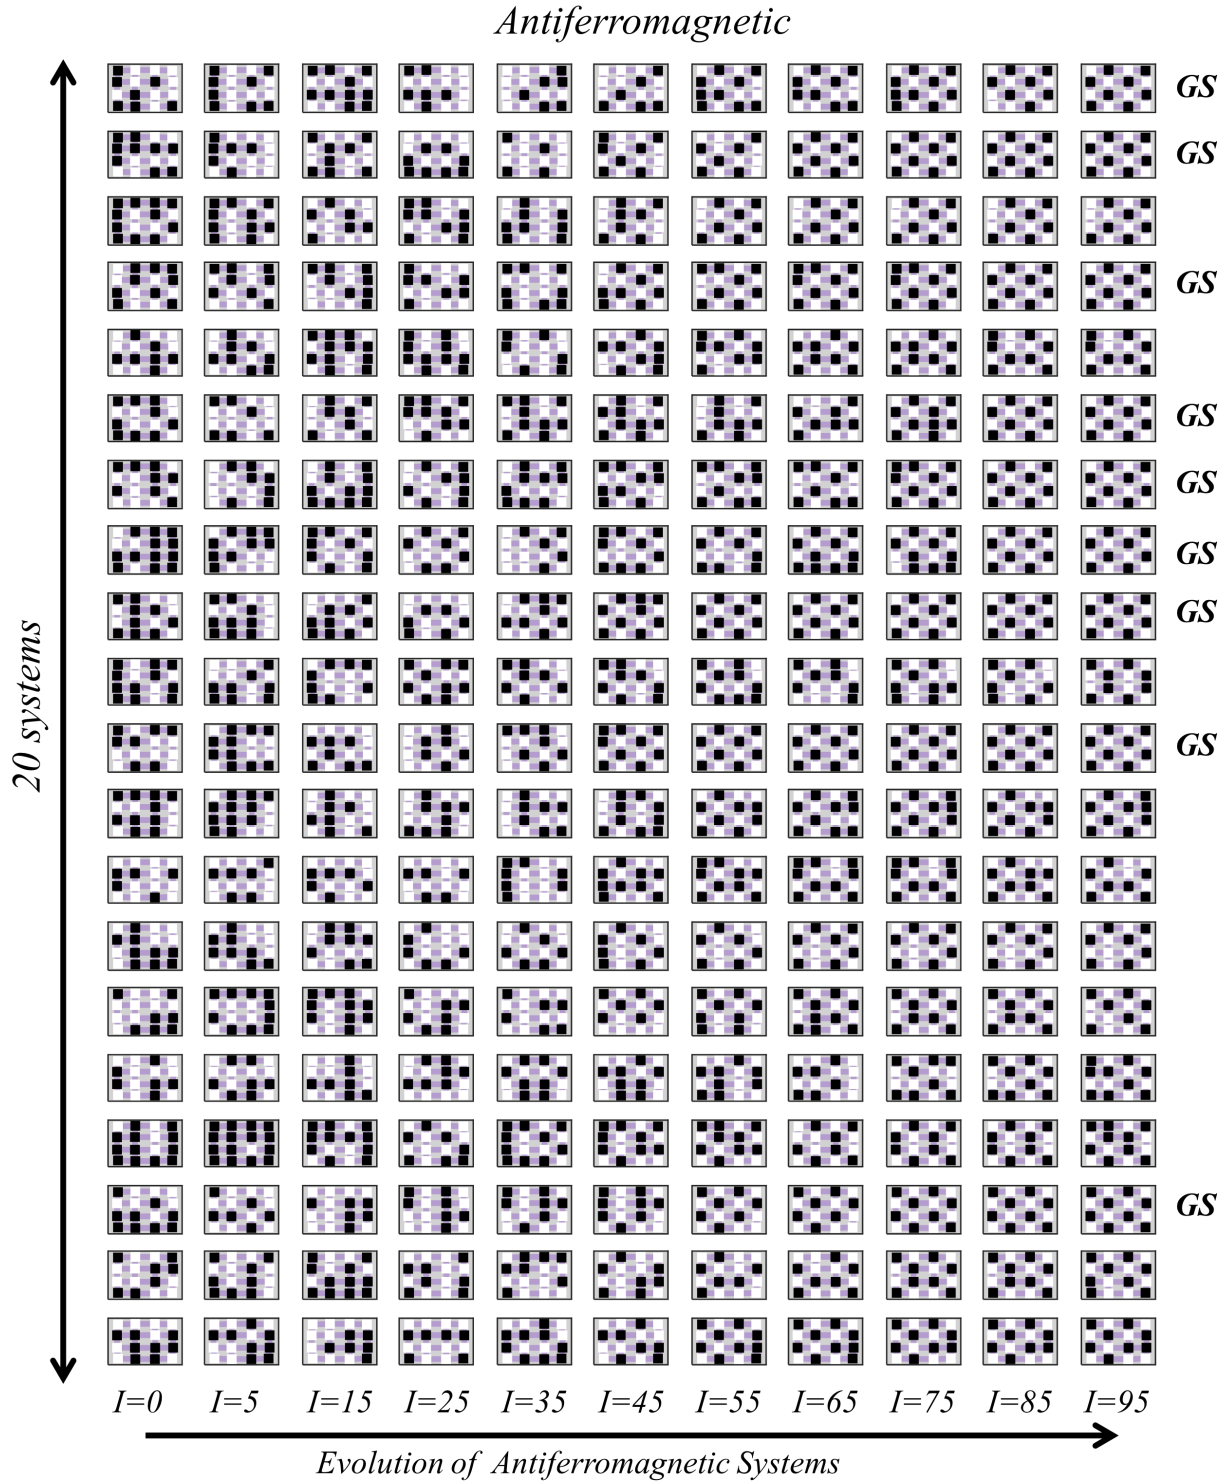

**Supplementary Figure 4. Experimental demonstration of SA on antiferromagnetic system.** Progression of 20 randomly initiated  $4 \times 4$  antiferromagnetic systems as successive iterations ( $I$ ) are performed using SA in hardware. 9 systems converged and reached their ground states.

***Supplementary Figure 5***

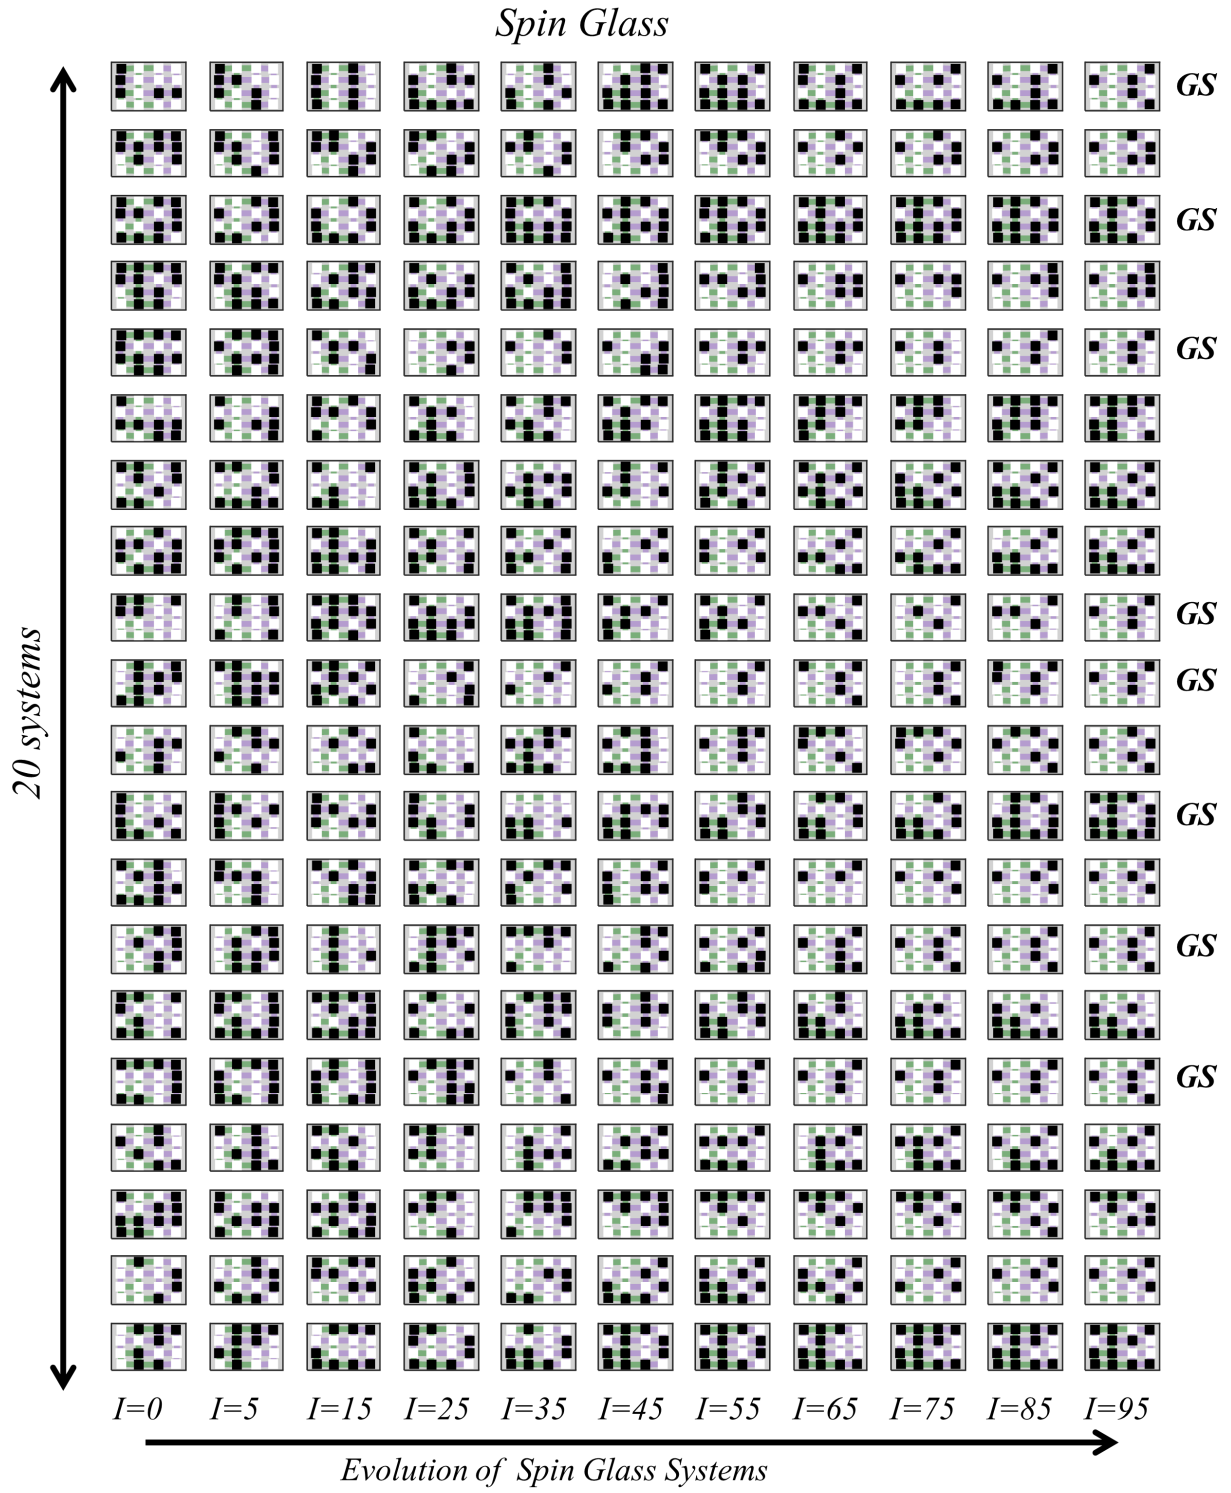

***Supplementary Figure 5. Experimental demonstration of SA on a spin glass system. Progression of 20 randomly initiated  $4 \times 4$  spin glass system systems as successive iterations ( $I$ ) are performed using SA in hardware. 8 systems converged and reached their ground states.***

***Supplementary Figure 6***

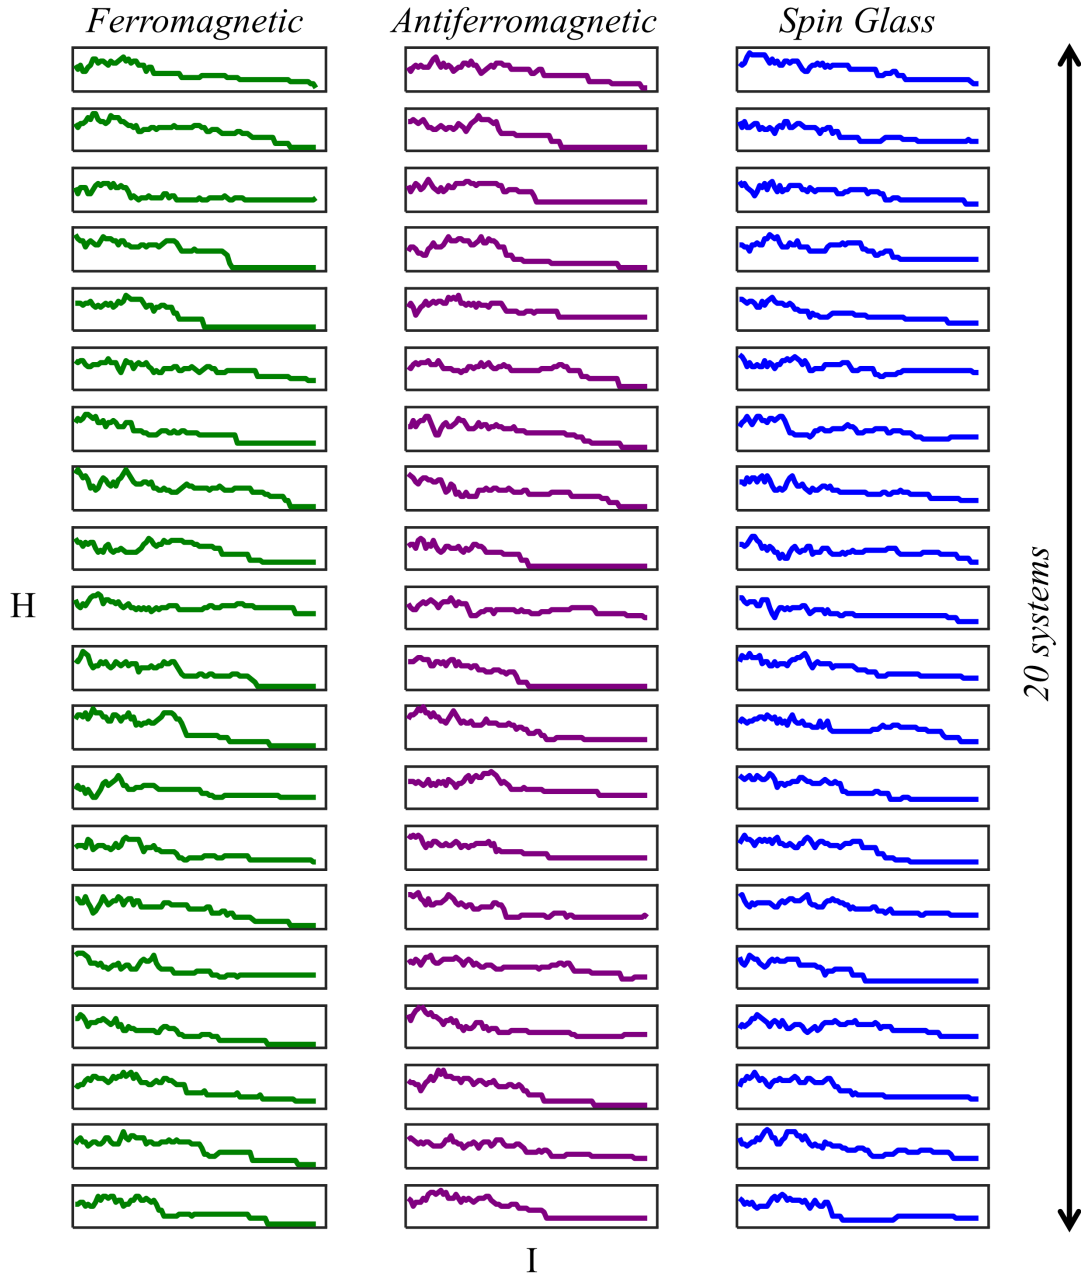

***Supplementary Figure 6. Evolution of free energy ( $H$ ) during SA.*** Evolution of free energy ( $H$ ) for 20 ferromagnetic, antiferromagnetic and spin glass systems as a function of iterations.

***Supplementary Figure 7***

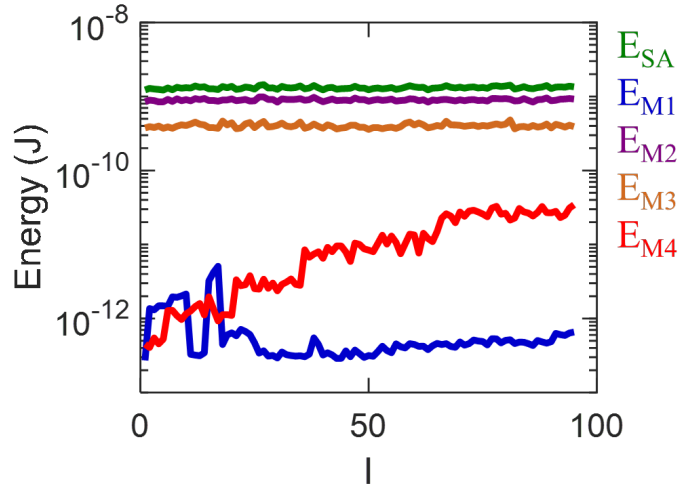

***Supplementary Figure 7. Energy expenditure for hardware acceleration of SA.*** Energy expenditure by hardware modules M1 ( $E_{M1}$ ), M2 ( $E_{M2}$ ), M3 ( $E_{M3}$ ), M4 ( $E_{M4}$ ), and total energy ( $E_{SA}$ ) averaged over 60 spin systems as a function of iterations (I).
